# Supplementary figures and images for: Nivolumab-induced synovitis is characterized by florid T cell infiltration and rapid resolution with synovial biopsy-guided therapy
Source: PubMed Central journal article supplement — J Immunother Cancer. 2020 Jun 21;8(1):e000281. doi: 10.1136/jitc-2019-000281 (PMC7311067; doi:10.1136/jitc-2019-000281), 2020-06-21

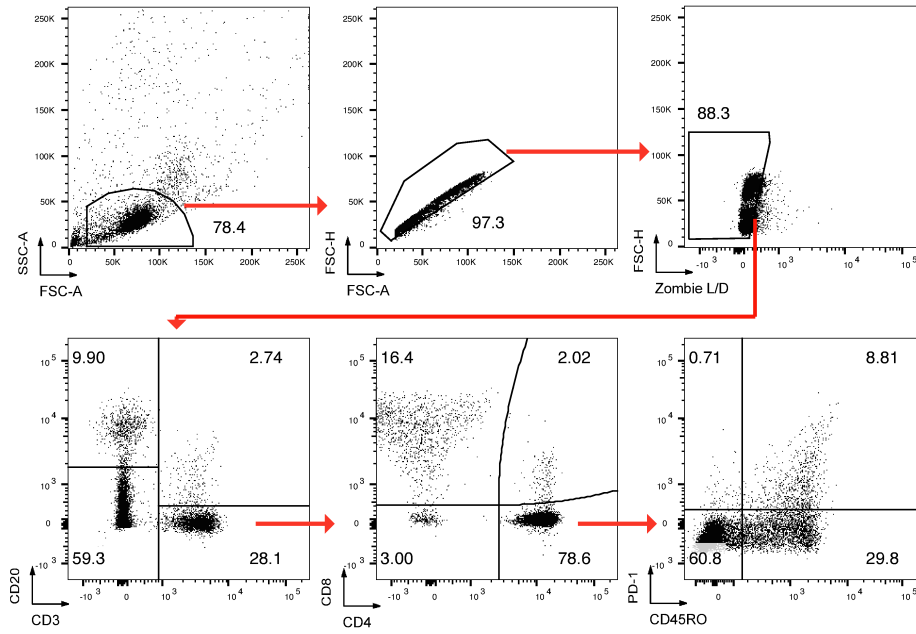

Supplement: jitc-2019-000281supp002.pdf [file jitc-2019-000281supp002.pdf]

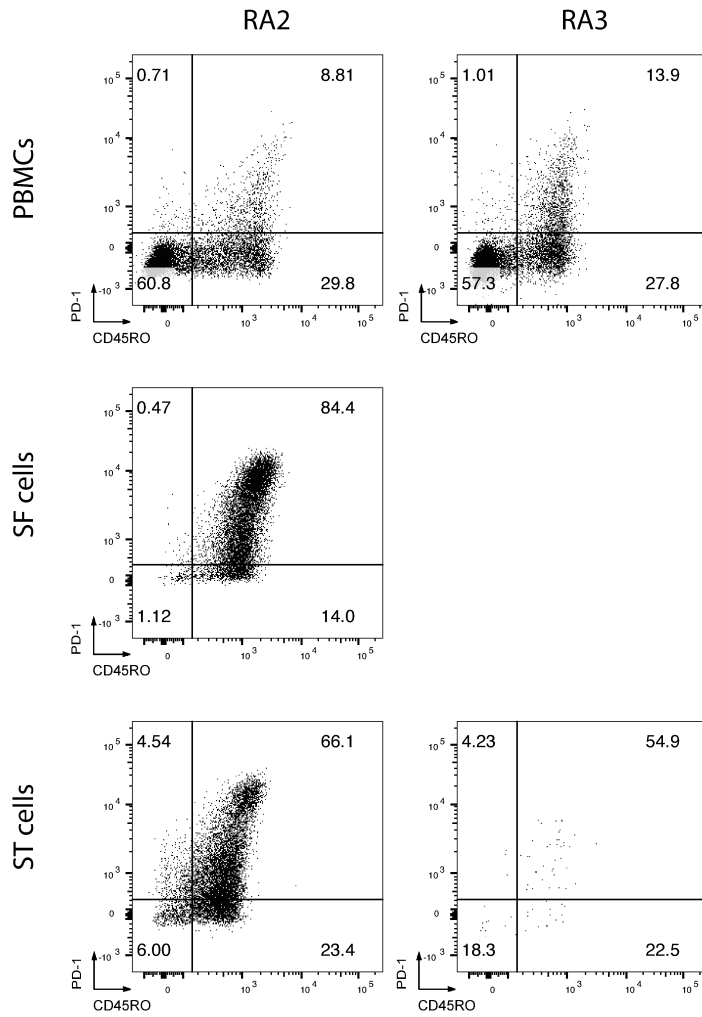

Supplement: jitc-2019-000281supp003.pdf [file jitc-2019-000281supp003.pdf]
